# Supplementary material for: The CARD9-Associated C-Type Lectin, Mincle, Recognizes La Crosse Virus (LACV) but Plays a Limited Role in Early Antiviral Responses against LACV
Source: Viruses. 2019 Mar 26;11(3):303. doi: 10.3390/v11030303 (PMC6466035; doi:10.3390/v11030303)
Supplement: Supplementary file 1 [file viruses-11-00303-s001.pdf]

# The CARD9-associated C-type lectin, Mincle, recognizes La Crosse virus (LACV) but plays a limited role in early antiviral responses against LACV

João T. Monteiro <sup>1</sup>, Kathleen Schön <sup>1,2</sup>, Tim Ebbecke <sup>1</sup>, Ralph Goethe <sup>3</sup>, Jürgen Ruland <sup>4,5,6,7</sup>, Wolfgang Baumgärtner <sup>8</sup>, Stefanie C. Becker <sup>2,\*</sup> and Bernd Lepenies <sup>1,\*</sup>

1 Immunology Unit & Research Center for Emerging Infections and Zoonoses, University of Veterinary Medicine Hannover, Hannover, Germany.

2 Institute for Parasitology and & Research Center for Emerging Infections and Zoonoses, University of Veterinary Medicine Hannover, Hannover, Germany.

3 Institute for Microbiology, University of Veterinary Medicine Hannover, Hannover, Germany.

4 Institute of Clinical Chemistry and Pathobiochemistry, School of Medicine, Technical University of Munich, Munich, Germany.

5 Department of Pathology, University of Veterinary Medicine Hannover, Hannover, Germany.

\* Correspondence: stefanie.becker@tiho-hannover.de; bernd.lepenies@tiho-hannover.de

**Table S1** – Primers used to amplify the extracellular domain of murine or human C-type lectins.

| CLR             | Primers                                 |
|-----------------|-----------------------------------------|
| Murine CLEC12B  | FW 5' CCATGGACTTTCTCTAGGATGTCTG 3'      |
|                 | RV 5' AGATCTGCATGGGTTTGCAATAGGTC 3'     |
| Murine CLEC13A  | FW 5' GAATTCCTGTCCTTCATCTACCTGGGTCC 3'  |
|                 | RV 5' CCATGGTGTTCATATGGGATTGCTGCTTT 3'  |
| Murine CLEC5A   | FW 5' GAATCCCCCACGGAGAGCTACGGAACCA 3'   |
|                 | RV 5' CCATGGTGGCATTTCATTCGCAGATCCA 3'   |
| Murine Langerin | FW 5' GATATCAGGTCGTGTGGACGATGCTGAGGT 3' |
|                 | RV 5' CCATGGTTTGGACGTAGGGCCTCTTGCAG 3'  |
| Murine Dectin-1 | FW 5' GAATTCCTCAGGGAGAAATCCAGAGG 3'     |
|                 | RV 5' AGATCTTGAAGAAGTATTGCAGATTGGTT 3'  |
| Murine Dectin-2 | FW 5' GAATTCCTGGAGCACCAGTGAGCAGAAC 3'   |
|                 | RV 5' CCATGGAGAAAACATCATTCCAGCCCC 3'    |
| Murine Mincle   | FW 5' CCATGGGGCAGAACTTACAGCCACAT 3'     |
|                 | RV 5' AGATCTGTCCAGAGGACTTATTTCTG 3'     |
| Murine DCAR     | FW 5' CCATGGAAGTTGACAGGTACCATTTCATT 3'  |
|                 | RV 5' AGATCTTAAGTTTATTTCTTCATCTGAC 3'   |
| Murine SIGNR3   | FW 5' GAATTCATGCAACTGAAGGCTGAAG 3'      |
|                 | RV 5' AGATCTTTGGTGGTGCATGATGAGG 3'      |
| Murine MGL-1    | FW 5' CCAAGTAAGGAGGGACCTAGGCAC 3'       |
|                 | RV 5' AGCTCTCCTTGGCCAGCTTCATC 3'        |
| Human DC-SIGN   | FW 5' GAATTCGTCCAAGGTCCCCAGCTCCAT 3'    |
|                 | RV 5' CCATGGACGCAGGAGGGGGGTTGGGGT 3'    |
| Human L-SIGN    | FW 5' GAATTCCTATCAAGAACTGACCGATTG 3'    |
|                 | RV 5' CCATGGATTCGTCTCTGAAGCAGGC 3'      |

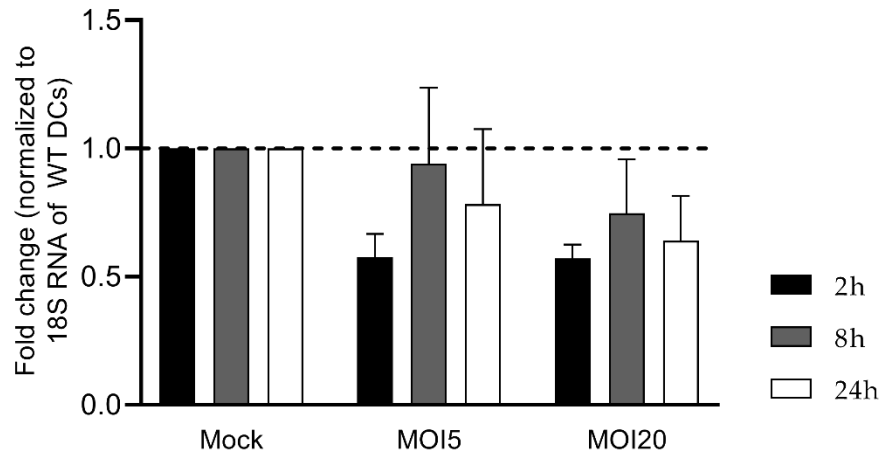

**Figure S1** – CARD9 mRNA expression levels in LACV-infected WT DCs. The mock-infected DCs were used as a baseline at the respective time points to evaluate differences in CARD9 expression. Data shown are mean  $\pm$  SEM; three independent experiments were performed. A two-way ANOVA with a Tukey's honest significance test was used to compare differences between the different groups and  $p < 0.05$  was considered significant (\*  $p < 0.05$ ).

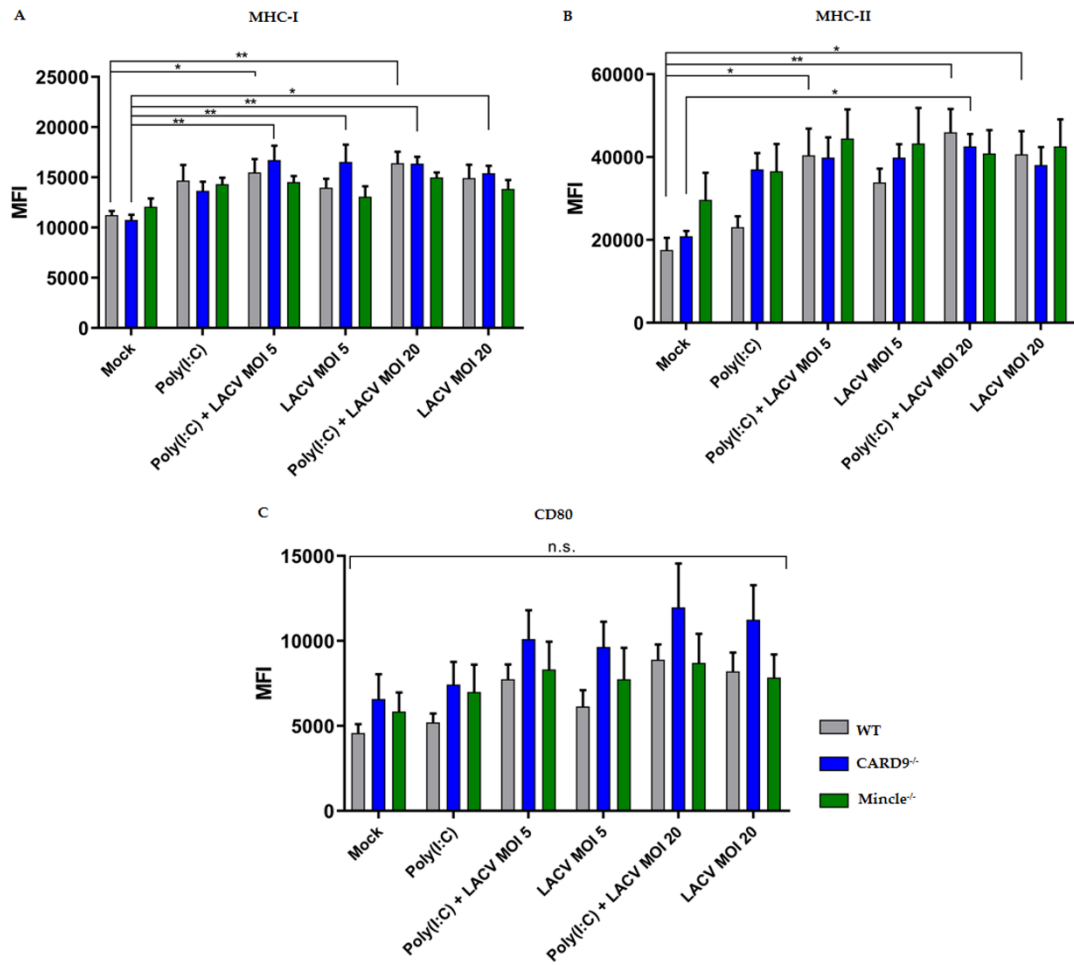

**Figure S2** – Effector functions of Mincle<sup>-/-</sup>, CARD9<sup>-/-</sup> and WT DCs after 8h of LACV infection. **(A)** Surface expression of MHC-I; **(B)** Surface expression of MHC-II; **(C)** Surface expression of CD80 in Mincle<sup>-/-</sup>, CARD9<sup>-/-</sup> or WT DCs. Data represented are mean  $\pm$  SEM (of three independent experiments. Data are presented as MFI (median fluorescence intensity) values. A two-way ANOVA with a Tukey's honest significance test was performed and  $p < 0.05$  was considered significant (\*  $p < 0.05$ , \*\*  $p < 0.01$ , \*\*\*  $p < 0.001$ , \*\*\*\*  $p < 0.0001$ ).

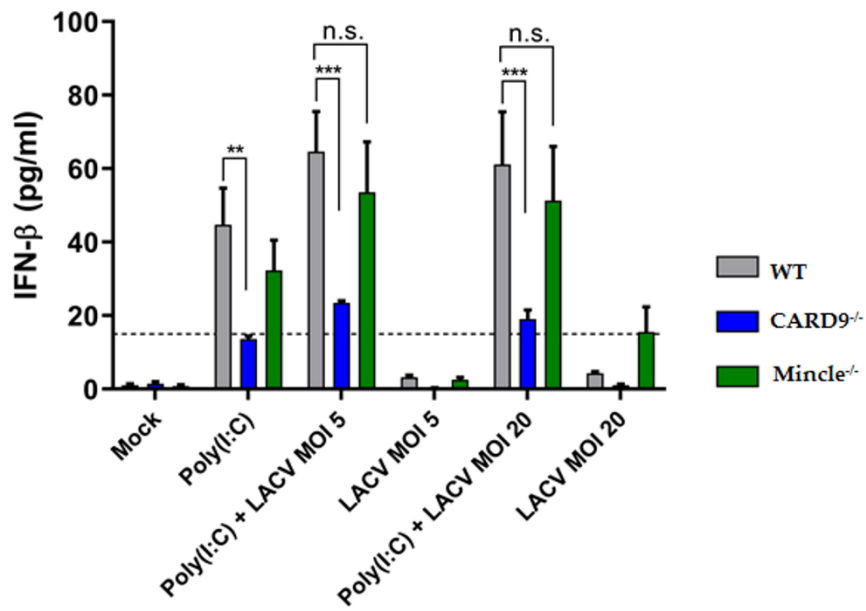

**Figure S3** – CARD9<sup>-/-</sup> DCs exhibit a decreased IFN- $\beta$  production. IFN- $\beta$  production was evaluated in Mincle<sup>-/-</sup>, CARD9<sup>-/-</sup> and WT DCs after 24h of stimulation with LACV. Data represented are mean  $\pm$  SEM of four independent experiments. The dotted line represents the limit of detection of the ELISA kit (16 pg/ml). A two-way ANOVA with a Tukey's honest significance test was performed and a  $p < 0.05$  was considered significant (\*  $p < 0.05$ , \*\*  $p < 0.01$ , \*\*\*  $p < 0.001$ ).

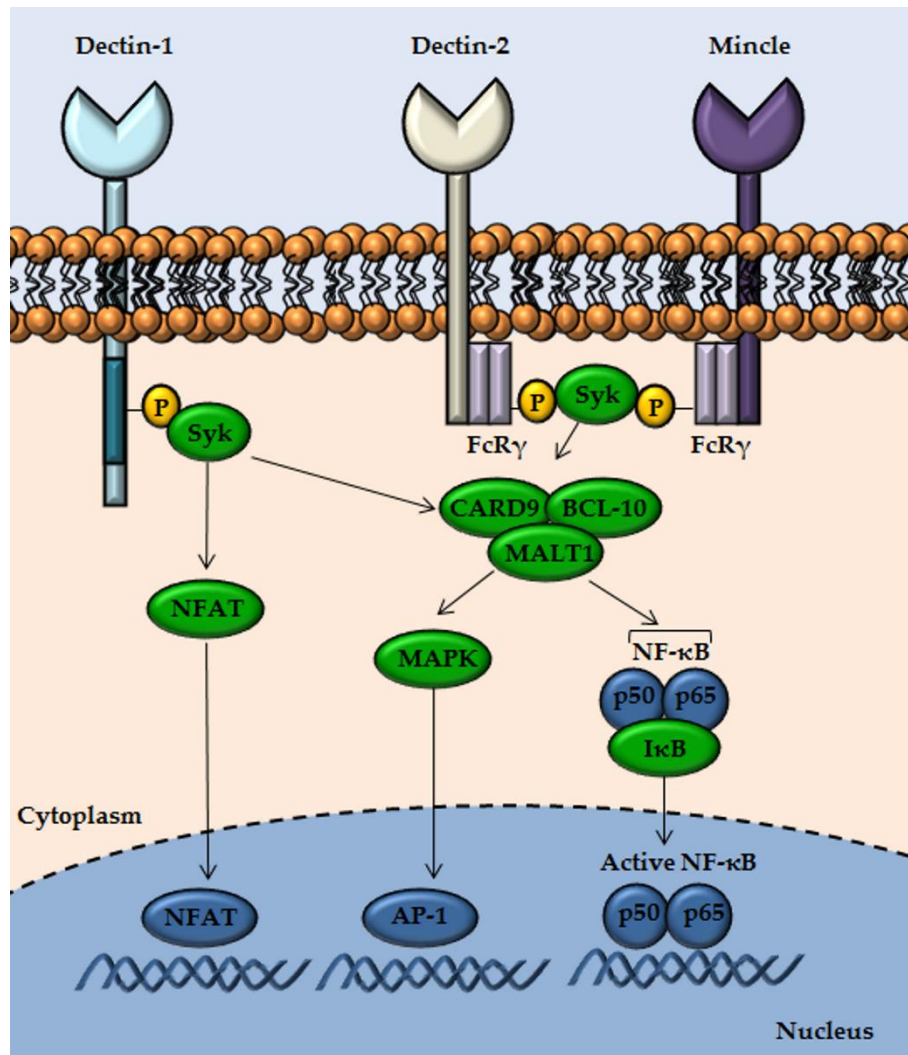

**Figure S4** – Engagement of CARD9-associated CLR receptors and downstream signaling cascades. CLRs recognize conserved glycans on the surface of pathogens or host cells. CLR engagement prompts the use of the adaptor chain Fc receptor  $\gamma$ -chain (FcR $\gamma$ ) for Dectin-2 and Mincle mediated activation of spleen tyrosine kinase, Syk; while Dectin-1 only requires the phosphorylation of its intracellular hemi-immunoreceptor tyrosine-based activating motif (hemITAM). Activation of Syk leads to assembly of the caspase-recruitment domain 9 (CARD9)/B cell lymphoma/leukaemia 10 (BCL10)/mucosa-associated lymphoid tissue lymphoma translocation protein 1 (Malt1) (CARD9/BCL10/Malt1) complex and/or further activation of the transcription factors nuclear factor of activated T cell (NFAT), nuclear factor- $\kappa$ B (NF- $\kappa$ B) and activator protein-1 (AP-1), by mitogen-activated protein kinase (MAPK signaling). Activation of these transcription factors is required for early pro-inflammatory responses.
